# Supplementary material for: Extensional reactivation of the Penninic frontal thrust 3 Myr ago as evidenced by U–Pb dating on calcite in fault zone cataclasite
Source: Copernicus journal article supplement (doi:10.5194/se-12-237-2021), 2021-01-28
Supplement: Supplementary file 2 [file se-12-237-2021-supplement.zip]

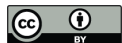

## *Supplement of*

# **Extensional reactivation of the Penninic frontal thrust 3 Myr ago as evidenced by U–Pb dating on calcite in fault zone cataclasite**

**Antonin Bilau et al.**

*Correspondence to:* Antonin Bilau ([antonin.bilau@univ-smb.fr](mailto:antonin.bilau@univ-smb.fr)) and Yann Rolland ([yann.rolland@univ-smb.fr](mailto:yann.rolland@univ-smb.fr))

- [se-12-237-2021-supplement-title-page.pdf](#)
- [Bilau\\_Supplementary\\_Material\\_Corr\\_bonus.pdf](#)
- [Suppl. Mat.\\_Table2\\_U-Pb results.xlsx](#)

The copyright of individual parts of the supplement might differ from the CC BY 4.0 License.
