# Supplementary material for: Extensional reactivation of the Penninic frontal thrust 3 Myr ago as evidenced by U–Pb dating on calcite in fault zone cataclasite
Source: Copernicus journal article supplement (doi:10.5194/se-12-237-2021), 2021-01-28
Supplement: Supplementary file 3 [file se-12-237-2021-supplement.zip]

Archive with 3 entries (3 files):
- se-12-237-2021-supplement-title-page.pdf
- Bilau_Supplementary_Material_Corr_bonus.pdf
- Suppl. Mat._Table2_U-Pb results.xlsx
