# Supplementary material for: Extensional reactivation of the Penninic frontal thrust 3 Myr ago as evidenced by U–Pb dating on calcite in fault zone cataclasite
Source: Copernicus journal article supplement (doi:10.5194/se-12-237-2021), 2021-01-28
Supplement: Supplementary file 3 [file se-12-237-2021-supplement.zip › Suppl. Mat._Table2_U-Pb results.xlsx]

## Sheet: FP18-2B&3B
	Suppl. Mat. 2. U/Pb LA-ICPMS data
	Date 20/11/19	Name	238U	206Pb	207Pb	238U	2σ	207Pb	2σ
	Spot Number		(cps)	(cps)	(cps)	206Pb	(%)	206Pb	(%)
	1	NIST614-01	121200	91780	79720	1.2743	1.06141	0.870447	0.827586
	2	NIST614-02	124200	93000	81180	1.29168	1.19671	0.871247	0.792375
	25	NIST614-03	129000	96970	84030	1.28685	1.27628	0.869446	1.26582
	26	NIST614-04	130800	96230	83290	1.31584	1.32159	0.868046	1.14108
	49	NIST614-05	112500	86190	75400	1.26367	1.07034	0.87595	0.719589
	50	NIST614-06	124600	93330	81570	1.28975	1.04869	0.875349	0.811521
	73	NIST614-07	126000	94500	82330	1.29265	1.34529	0.871647	0.677227
	74	NIST614-08	123800	92220	80060	1.29652	0.968703	0.867545	0.761158
	97	NIST614-09	119400	90860	78820	1.2714	1.21581	0.868946	0.782959
	98	NIST614-10	114100	85620	74580	1.28782	1.05026	0.872348	0.848721
	121	NIST614-11	134800	100440	87370	1.29845	1.11607	0.871347	0.895625
	122	NIST614-12	130000	97080	84460	1.29555	1.34228	0.870147	0.781879
	3	WC1-01	945800	41310	5770	22.0949	0.699606	0.139972	1.57255
	4	WC1-02	1013900	43860	6170	22.3654	0.863931	0.142073	1.83099
	27	WC1-03	730200	31680	3730	22.52	1.4586	0.118061	2.88136
	28	WC1-04	972800	41260	5480	22.8484	0.718816	0.132968	1.95636
	51	WC1-05	676600	28850	3096	22.6745	0.937367	0.108256	2.49538
	52	WC1-06	965300	43010	6500	21.776	0.931677	0.150577	2.12625
	75	WC1-07	812000	37420	5330	21.0128	1.01149	0.142673	2.24404
	76	WC1-08	678900	26940	3470	24.4039	0.989707	0.129066	2.32558
	99	WC1-09	837100	37340	4894	21.6601	0.892061	0.131768	1.97418
	100	WC1-10	824900	36200	4599	22.0272	0.921053	0.127065	2.04724
	124	WC1-12	698300	30930	3960	21.7567	0.932504	0.127465	2.1978
	123	WC1-11	864800	38090	5430	21.9016	1.10278	0.141673	2.33051
	5	FP18-3B-01	1027900	5700	4390	192.255	6.53266	0.771396	3.63165
	6	FP18-3B-02	1193500	3510	2500	335.239	3.7464	0.722371	3.4626
	7	FP18-3B-03	567500	24830	20420	22.2591	2.17014	0.824423	1.20146
	8	FP18-3B-04	653900	6670	5340	95.8378	2.21774	0.805413	2.36025
	9	FP18-3B-05	763000	10800	8740	68.8834	2.38429	0.812417	1.72414
	10	FP18-3B-06	1419800	4560	3240	303.261	2.26187	0.715367	2.7972
	11	FP18-3B-07	796100	31870	26010	24.1334	0.880705	0.81842	1.10024
	12	FP18-3B-08	1112200	30040	24290	35.9005	1.34553	0.810416	1.35802
	13	FP18-3B-09	1227000	15170	12150	79.2208	2.31707	0.802412	1.62095
	14	FP18-3B-10	942500	15350	12500	61.058	3.00633	0.813418	1.47601
	15	FP18-3B-11	333900	56100	46200	6.12512	5.83596	0.823022	1.05762
	16	FP18-3B-12	440800	63120	52300	6.73377	1.57819	0.829826	0.892211
	17	FP18-3B-13	757300	30470	25080	24.143	2.0008	0.822322	1.15586
	18	FP18-3B-14	862600	25480	20840	32.8766	1.43991	0.819921	1.09823
	19	FP18-3B-15	1846000	16720	13250	107.528	1.7071	0.794408	1.38539
	20	FP18-3B-16	315200	67000	55400	4.61799	2.51046	0.829025	0.796524
	21	FP18-3B-17	463400	46590	38490	9.65141	1.8018	0.827725	1.01535
	22	FP18-3B-18	716500	11820	9480	59.1257	1.63399	0.808415	1.9802
	23	FP18-3B-19	1197400	7110	5410	163.659	1.4758	0.765393	2.22222
	24	FP18-3B-20	1260000	4850	3620	259.883	4.08922	0.75939	2.50329
	29	FP18-3B-21	626200	12630	10020	48.2087	2.20441	0.79841	2.25564
	30	FP18-3B-22	305500	30200	24920	10.1055	4.0153	0.822422	1.3382
	31	FP18-3B-23	512200	20280	16330	24.6744	1.3704	0.810416	1.23457
	32	FP18-3B-24	494200	63000	51810	7.67089	1.88917	0.822822	0.911965
	33	FP18-3B-25	470100	80110	66210	5.67878	1.08881	0.828025	0.77332
	34	FP18-3B-26	462300	107300	88760	4.17455	1.08771	0.828725	0.700229
	35	FP18-3B-27	418000	141400	116900	2.87224	2.82543	0.827625	0.701161
	36	FP18-3B-28	432900	165900	137400	2.54086	1.74905	0.828225	0.531529
	37	FP18-3B-29	33390	44190	36620	0.732309	1.58311	0.830226	1.04845
	38	FP18-3B-30	1855000	7810	5900	248.289	5.05837	0.758389	2.37467
	39	FP18-3B-31	1999000	4450	3180	433.782	3.78619	0.724372	5.93923
	40	FP18-3B-32	739400	3770	2840	197.376	4.79687	0.762391	2.62467
	41	FP18-3B-33	597400	5940	4760	98.0599	2.06897	0.805413	2.1118
	42	FP18-3B-34	754000	52020	42610	14.0665	1.0989	0.820321	0.841566
	43	FP18-3B-35	322000	16190	13000	19.2835	1.25251	0.804413	1.36816
	44	FP18-3B-36	624000	24660	20020	24.8386	3.46169	0.813918	1.19238
	45	FP18-3B-37	848800	4930	3860	167.523	2.65283	0.783402	3.19285
	46	FP18-3B-38	1540600	9630	7390	155.93	1.98265	0.764392	1.83246
	47	FP18-3B-39	460700	3720	2960	135.448	5.84879	0.811416	3.20592
	48	FP18-3B-40	371800	28200	23160	13.2743	3.93013	0.822122	1.15614
	53	FP18-3B-41	306900	32710	27020	9.12971	2.01058	0.828925	1.05009
	54	FP18-3B-42	1512000	3045	2021	494.647	3.71094	0.672345	3.57143
	55	FP18-2B-01	467100	15640	13050	29.4469	3.01837	0.830426	2.40964
	56	FP18-2B-02	1043200	19430	15430	52.0345	1.13257	0.800411	1.5
	57	FP18-2B-03	319300	48640	40280	6.34442	1.23344	0.827425	1.20919
	58	FP18-2B-04	260700	81100	67010	3.1128	0.993172	0.830126	1.01241
	59	FP18-2B-05	209700	61250	50530	3.31375	1.45773	0.828425	1.3285
	60	FP18-2B-06	109800	131800	110150	0.803898	0.985458	0.83733	0.657187
	61	FP18-2B-07	348000	54310	44900	6.18308	1.875	0.826624	1.19826
	62	FP18-2B-08	317300	45700	37880	6.70285	0.922456	0.828425	1.20773
	63	FP18-2B-09	360600	189800	156930	1.83657	1.05208	0.827825	0.894368
	64	FP18-2B-10	721100	895300	744000	0.778586	0.781735	0.831727	0.637556
	65	FP18-2B-11	333600	56700	47070	5.72901	1.85497	0.833528	1.00828
	66	FP18-2B-12	573200	656000	541900	0.844377	0.881007	0.827225	0.955491
	67	FP18-2B-13	412500	27730	22950	14.337	2.08895	0.836429	1.91388
	68	FP18-2B-14	621300	685000	566600	0.876356	0.948076	0.828225	0.918096
	69	FP18-2B-15	478700	25880	21140	17.9116	1.24056	0.81842	1.58924
	70	FP18-2B-16	444300	5840	4650	73.5207	3.02234	0.793407	4.28752
	71	FP18-2B-17	337100	5190	4140	63.28	2.74809	0.804413	3.85572
	72	FP18-2B-18	11090	14250	11780	0.754529	7.42638	0.830426	2.40964
	77	FP18-2B-19	435000	233900	192400	1.79986	1.23457	0.823423	1.09356
	78	FP18-2B-20	134300	28920	23680	4.50206	1.1588	0.824423	1.33495
	79	FP18-2B-21	174800	11340	9320	14.9167	1.87824	0.822422	2.18978
	80	FP18-2B-22	246500	70810	58780	3.36495	1.0623	0.831727	1.08264
	81	FP18-2B-23	112400	27370	22690	4.00934	2.6506	0.832427	1.32212
	82	FP18-2B-24	180300	383600	316900	0.454553	1.25399	0.826624	0.472041
	83	FP18-2B-25	316000	35800	30000	8.80123	6.25686	0.827425	1.81378
	84	FP18-2B-26	296100	21690	17810	13.2067	1.46306	0.823423	1.57959
	85	FP18-2B-27	50500	47800	39100	1.0347	2.42764	0.825424	1.33333
	86	FP18-2B-28	242100	192500	159400	1.2144	0.875099	0.829025	0.712044
	87	FP18-2B-29	366300	555800	458900	0.639563	1.14804	0.826424	0.641647
	88	FP18-2B-30	33010	18700	15480	1.72547	2.74356	0.833428	1.92077
	89	FP18-2B-31	638300	751000	622700	0.827857	0.898588	0.828725	0.386333
	90	FP18-2B-32	98800	47100	39100	2.04621	1.84136	0.830326	1.03627
	91	FP18-2B-33	121700	209600	172700	0.561211	1.03288	0.825023	0.497211
	92	FP18-2B-34	149800	234400	193100	0.618985	0.936476	0.826224	0.520707
	93	FP18-2B-35	18860	105400	87340	0.17303	1.89838	0.830026	0.626808
	94	FP18-2B-36	379900	211000	174400	1.73899	0.888889	0.828125	0.531594
	95	FP18-2B-37	488900	414900	342900	1.1401	0.550801	0.826724	0.471984
	96	FP18-2B-38	371500	553000	456800	0.649031	0.625186	0.826724	0.447779
	101	FP18-2B-39	46200	20200	17000	2.26262	2.8181	0.832427	1.5625
	102	FP18-2B-40	643100	234900	193900	2.65293	1.38383	0.824923	0.485142
	103	FP18-2B-41	815000	185900	153300	4.28951	2.7027	0.826424	0.690073

## Sheet: FP18-3A
	Suppl. Mat. 2. U/Pb LA-ICPMS data
	Date 25/11/19	Name	238U	206Pb	207Pb	238U	2σ	207Pb	2σ
	Spot Number		(cps)	(cps)	(cps)	206Pb	(%)	206Pb	(%)
	22	NIST614-03	111300	85800	75000	1.26197	1	0.874745	0.891327
	23	NIST614-04	104200	81900	71550	1.23576	1.02121	0.872246	0.79074
	46	NIST614-05	101300	80200	69700	1.22411	1.26883	0.866649	1.26874
	47	NIST614-06	99560	78150	68070	1.23576	1.02121	0.872046	1.12334
	70	NIST614-07	97400	77200	67040	1.22217	0.953137	0.868548	1.02428
	71	NIST614-08	94400	75240	65500	1.22022	1.03421	0.871846	1.07773
	1	WC1-02	836200	36470	4121	22.2591	1.00305	0.112854	1.94863
	24	WC1-03	921000	36790	3791	24.3074	0.798722	0.103358	1.93424
	25	WC1-04	665000	28780	3040	22.4145	1.12603	0.104358	3.16092
	48	WC1-05	860200	35990	3940	22.7542	3.45563	0.109955	11.8182
	49	WC1-06	755000	32490	2845	22.5504	0.860956	0.0877644	2.61959
	72	WC1-07	415600	17660	2280	22.929	1.27011	0.129847	3.31024
	73	WC1-08	351300	15340	2366	22.2883	1.17596	0.153738	3.05592
	2	FP18-3A-01	819000	26820	21820	29.8601	2.53576	0.816369	1.18771
	3	FP18-3A-02	619000	28290	23040	21.9291	3.71846	0.820567	1.19381
	4	FP18-3A-03	520800	45600	38250	11.2121	3.37662	0.832962	1.02004
	5	FP18-3A-04	406000	29210	24070	13.5516	1.14613	0.824666	1.21212
	6	FP18-3A-05	454200	26760	21960	16.5803	1.40515	0.825965	1.1376
	7	FP18-3A-06	957000	24030	19640	38.7424	1.80406	0.816669	1.22399
	8	FP18-3A-07	678800	45800	38100	15.1048	4.30591	0.829464	0.903832
	9	FP18-3A-08	482100	35620	28990	13.1439	1.25554	0.81367	1.01966
	10	FP18-3A-09	846800	45570	37410	18.1044	1.01877	0.820467	0.86501
	11	FP18-3A-10	1052000	22990	18760	44.5183	1.43916	0.818668	1.5873
	12	FP18-3A-11	1073000	4000	2570	346.555	6.44258	0.726705	5.91472
	13	FP18-3A-12	596000	1790	1330	339.76	6.85714	0.754694	7.28477
	14	FP18-3A-13	1423000	9890	7800	140.175	2.00831	0.78968	2.78481
	15	FP18-3A-14	1789000	12650	9910	146	4.72074	0.783682	1.91327
	16	FP18-3A-15	1234000	11700	9300	121.925	5.57325	0.803674	1.86567
	17	FP18-3A-16	1262000	18320	14820	67.2725	2.0202	0.806673	1.48699
	18	FP18-3A-17	980000	1869	1249	529.055	4.0367	0.673727	4.59941
	19	FP18-3A-18	1092000	1696	1154	662.047	5.27859	0.676726	5.02216
	20	FP18-3A-19	630800	3900	3010	166.968	5.81395	0.773686	4.13437
	21	FP18-3A-20	1502000	9020	6990	164.832	3.06243	0.790679	2.78129
	26	FP18-3A-21	1261000	12820	10240	103.093	5.36723	0.792679	2.01765
	27	FP18-3A-22	1789000	7390	5640	238.9	2.80374	0.76469	2.22222
	28	FP18-3A-23	1382000	10200	8100	158.134	3.99018	0.780683	2.30474
	29	FP18-3A-24	1387000	34900	27900	49.7021	5.66406	0.803674	1.74129
	30	FP18-3A-25	1814000	4890	3331	372.28	2.37288	0.697717	2.86533
	31	FP18-3A-26	963000	19400	15980	48.9255	4.16667	0.818668	1.5873
	32	FP18-3A-27	1147600	15880	12840	72.9999	2.79255	0.794678	1.63522
	33	FP18-3A-28	499700	1130	1300	602.832	14.8148	0.759692	14.4737
	34	FP18-3A-29	1453000	6940	5250	210.651	3.31797	0.759692	2.10526
	35	FP18-3A-30	1404000	1814	1095	791.156	4.53988	0.609753	5.90164
	36	FP18-3A-31	1160000	25430	20630	44.5571	2.17865	0.81467	1.22699
	37	FP18-3A-32	1169000	5750	4380	199.779	2.38095	0.76569	2.48042
	38	FP18-3A-33	374600	90900	75300	4.03053	1.05973	0.824666	0.812121
	39	FP18-3A-34	650700	59940	49620	10.6005	1.8315	0.829364	0.819573
	40	FP18-3A-35	610600	72890	60060	8.12901	0.69262	0.821867	0.839212
	41	FP18-3A-36	289100	130100	107300	2.18029	2.84951	0.830363	0.830625
	42	FP18-3A-37	659000	34410	28480	18.4344	2.36967	0.820667	1.58343
	43	FP18-3A-38	924800	13260	10740	68.4374	2.2695	0.801675	2.24439
	44	FP18-3A-39	683000	37180	30490	17.9296	1.13698	0.821667	1.3382
	45	FP18-3A-40	887000	10730	8570	82.1249	3.30969	0.799676	2
	50	FP18-3A-41	449000	69810	57590	6.32925	3.06748	0.826365	0.991896
	51	FP18-3A-42	438100	103310	85050	4.1276	1.29351	0.823866	0.800777
	52	FP18-3A-43	422600	129600	106500	3.15977	1.19816	0.821667	0.790754
	53	FP18-3A-44	438900	100180	82720	4.26448	1.25199	0.826465	0.749879
	54	FP18-3A-45	540700	59890	49350	8.82406	1.54015	0.823366	0.837684
	55	FP18-3A-46	285200	94700	77900	2.93553	2.51323	0.824866	0.836161
	56	FP18-3A-47	509900	80000	65300	6.31954	3.37942	0.825265	0.847868
	57	FP18-3A-48	535700	60300	49400	8.94055	3.04017	0.820967	0.96189
	58	FP18-3A-49	311800	2301	1816	132.409	2.85924	0.806673	3.9653
	59	FP18-3A-50	421400	7470	5750	54.9441	3.35689	0.782683	4.08685
	60	FP18-3A-51	560800	48410	39640	11.4062	2.55319	0.819968	0.999634
	61	FP18-3A-52	821100	5270	4100	152.504	2.03692	0.782683	2.80971
	62	FP18-3A-53	1277000	9810	7570	155.319	8.125	0.767689	1.95312

## Sheet: FP19-12A
	Suppl. Mat. 2. U/Pb LA-ICPMS data
	Date 13/07/20	Name	238U	206Pb	207Pb	238U	2σ	207Pb	2σ
	Spot Number		(cps)	(cps)	(cps)	206Pb	(%)	206Pb	(%)
	1	NIST614-01	129500	95290	83060	1.29757	0.811209	0.872582	0.734703
	2	NIST614-02	135200	97890	85440	1.32245	0.868307	0.872782	0.596809
	25	NIST614-03	113000	85300	73630	1.26886	1.28205	0.866772	1.14411
	26	NIST614-04	110400	82530	72110	1.28321	1.26771	0.87749	0.856164
	49	NIST614-05	103500	78460	68120	1.26025	1.06302	0.870178	0.79429
	50	NIST614-06	96700	74300	64870	1.2392	1.1583	0.873583	0.83706
	73	NIST614-07	108700	82060	71120	1.2679	1.28302	0.868775	0.760982
	74	NIST614-08	107700	82290	71000	1.25451	1.14416	0.864167	0.730265
	97	NIST614-09	104500	79100	68610	1.26503	1.36157	0.869977	0.829016
	98	NIST614-10	101200	76120	66160	1.27364	1.35237	0.87138	0.965628
	121	NIST614-11	90800	69890	60730	1.24111	1.23362	0.872081	0.735125
	122	NIST614-12	93800	72340	62710	1.24015	1.00309	0.869276	0.749021
	145	NIST614-13	97200	73940	64410	1.25546	1.21951	0.873383	0.768437
	146	NIST614-14	94200	71500	61700	1.2612	1.21396	0.864368	0.78804
	168	NIST614-15	99100	76240	66280	1.24302	1.3087	0.871981	0.758185
	169	NIST614-16	94200	73000	63380	1.23728	1.08275	0.87148	0.701149
	181	NIST614-17	103200	78240	67950	1.26695	1.0574	0.873183	0.757141
	182	NIST614-18	101200	76700	67120	1.25833	0.988593	0.876488	0.594286
	3	WC-1-01	715400	30630	4040	22.3916	1.11111	0.131523	3.3511
	4	WC-1-02	960900	40600	5366	22.6691	0.844238	0.132625	1.66163
	27	WC-1-03	947100	40690	5470	22.3151	0.814751	0.134528	1.78704
	28	WC-1-04	841100	35410	4522	22.7553	0.883095	0.128218	2.1875
	51	WC-1-05	752800	32300	3981	22.3725	0.898204	0.12381	1.77994
	52	WC-1-06	793700	34840	4679	21.8462	0.87604	0.134829	1.93165
	75	WC-1-07	767500	33200	4377	22.1428	0.907519	0.132525	2.04082
	76	WC-1-08	862000	37660	5110	21.7984	0.965759	0.135931	1.98968
	99	WC-1-09	793700	34380	4409	22.095	0.866176	0.128719	1.78988
	100	WC-1-10	674200	29630	3993	21.8079	0.965336	0.13523	2
	123	WC-1-11	755500	33800	4712	21.3869	0.894855	0.139837	1.79083
	124	WC-1-12	709500	29830	3736	22.7648	1.0929	0.125713	1.99203
	147	WC-1-13	535200	22760	2657	22.583	1.18644	0.117099	2.5663
	170	WC-1-15	465200	20050	2345	22.229	1.03315	0.1175	2.89855
	171	WC-1-16	868200	37520	4892	22.1716	0.906344	0.131724	1.74905
	183	WC-1-17	639500	27310	3412	22.4299	0.938567	0.125513	2.39425
	184	WC-1-18	705000	30700	4040	21.9323	0.91623	0.132024	2.12443
	6	FP-19-12A-02	289200	41740	34810	6.63137	1.7316	0.833816	1.03316
	7	FP-19-12A-03	178500	18660	15590	9.29158	2.88363	0.840427	1.54946
	8	FP-19-12A-04	451500	10670	8740	40.4772	1.63121	0.822396	1.70524
	9	FP-19-12A-05	425900	14870	12180	27.4633	1.25436	0.823398	1.45985
	10	FP-19-12A-06	345000	19700	16120	16.698	1.66189	0.822396	1.46163
	11	FP-19-12A-07	2560	51250	42940	0.0479411	3.99202	0.839926	0.78712
	12	FP-19-12A-08	2200	37070	30790	0.0571274	5.02513	0.829609	0.941801
	13	FP-19-12A-09	18400	8330	6890	2.15304	6.66667	0.832413	1.92539
	14	FP-19-12A-10	1033000	72300	59800	15.4349	6.07564	0.827405	0.883777
	15	FP-19-12A-11	380200	42280	34940	8.62174	1.44284	0.829308	1.02669
	16	FP-19-12A-12	126700	4198	3451	29.1474	2.00263	0.832413	3.00842
	17	FP-19-12A-13	2430000	17510	13520	132.915	1.2239	0.774315	1.42303
	18	FP-19-12A-14	1022000	13590	10680	72.2465	1.5894	0.791344	1.51899
	19	FP-19-12A-15	2664000	28150	22450	90.7149	1.37131	0.799858	1.13964
	20	FP-19-12A-16	1436000	20500	16260	67.6534	3.39463	0.793347	1.26263
	21	FP-19-12A-17	1381000	18740	15170	70.0169	1.31201	0.809374	1.36139
	22	FP-19-12A-18	364900	91400	75800	3.81615	1.15346	0.829809	0.736359
	23	FP-19-12A-19	573400	9790	7950	56.1705	1.87394	0.813381	2.46305
	24	FP-19-12A-20	515000	34910	28730	14.2388	2.75538	0.8247	0.935261
	29	FP-19-12A-21	125100	3733	3118	32.2382	1.92936	0.840427	2.74136
	30	FP-19-12A-22	317200	5880	4578	51.8644	2.02952	0.788339	2.66836
	31	FP-19-12A-23	250000	4319	3388	55.8834	1.88356	0.792345	2.52845
	32	FP-19-12A-24	445400	10760	8770	39.5681	1.47521	0.81839	1.83599
	33	FP-19-12A-25	1043900	12520	9950	79.9975	1.31579	0.797354	1.63317
	34	FP-19-12A-26	375500	6564	5265	54.9839	1.5141	0.806369	2.23602
	35	FP-19-12A-27	915200	38810	31540	22.6022	0.973751	0.816186	0.945017
	36	FP-19-12A-28	599000	167700	137900	3.42382	0.754612	0.823598	0.5838
	37	FP-19-12A-29	1024000	128800	105800	7.59306	0.642722	0.823298	0.620513
	38	FP-19-12A-30	1971000	121300	99400	15.6837	1.40329	0.822196	0.86501
	39	FP-19-12A-31	2012000	25350	20060	76.1699	1.21859	0.79535	1.38539
	40	FP-19-12A-32	2506000	39920	32220	60.4766	1.58228	0.809374	0.965347
	41	FP-19-12A-33	141800	13850	11420	9.84658	1.74927	0.831412	1.44578
	42	FP-19-12A-34	289600	18280	15000	15.2435	1.38104	0.823398	1.45985
	43	FP-19-12A-35	687500	45790	37670	14.3823	0.798403	0.823999	0.911743
	44	FP-19-12A-36	1232000	6970	5249	171.095	2.06935	0.758288	2.24571
	45	FP-19-12A-37	1884000	11190	8390	161.335	1.42349	0.752277	1.73103
	46	FP-19-12A-38	2058000	13350	10190	152.053	3.65009	0.763296	1.70604
	47	FP-19-12A-39	92400	5200	4389	17.1191	2.17999	0.847439	2.24586
	48	FP-19-12A-40	206500	4700	3778	42.2379	1.7671	0.808373	2.60223
	53	FP-19-12A-41	447900	9930	8120	43.4436	2.86344	0.822396	2.07065
	54	FP-19-12A-42	683300	58080	47730	11.2915	1.18644	0.826403	1.11515
	55	FP-19-12A-43	297800	8110	6680	35.329	1.73348	0.826403	2.06061
	56	FP-19-12A-44	533400	18160	14780	28.6115	2.9097	0.81839	1.71359
	57	FP-19-12A-45	906000	111870	92510	7.73182	1.48515	0.827505	0.847355
	58	FP-19-12A-46	1003000	148400	122500	6.48114	0.75299	0.828206	0.641026
	59	FP-19-12A-47	2309000	278600	230100	7.92415	1.00229	0.827705	0.605107
	60	FP-19-12A-48	1928000	62320	50260	29.6929	0.966806	0.808974	0.916295
	61	FP-19-12A-49	1077000	68160	55910	15.1	0.760456	0.820894	0.878585
	62	FP-19-12A-50	822000	59290	48900	13.301	2.44604	0.828006	0.834745
	63	FP-19-12A-51	2029000	446000	372000	5.21515	6.23853	0.832413	0.661853
	64	FP-19-12A-52	1745000	170000	139600	10.2198	3.74532	0.822797	0.572194
	65	FP-19-12A-53	1786000	45000	36300	41.2427	5.33643	0.806069	1.05629
	66	FP-19-12A-54	1576000	19320	15360	83.251	4.5977	0.799357	1.50376
	67	FP-19-12A-55	962900	169800	140380	5.44385	1.14256	0.827906	0.713854
	68	FP-19-12A-56	1100000	133200	109500	7.91554	0.725338	0.822897	0.657334
	69	FP-19-12A-57	520300	116250	95920	4.27929	0.939177	0.826503	0.848382
	70	FP-19-12A-58	2448000	124530	101710	18.8032	1.01781	0.816987	0.747916
	71	FP-19-12A-59	1258600	110920	91510	10.8609	0.881057	0.826403	0.872727

## Sheet: FP19-12B
	Suppl. Mat. 2. U/Pb LA-ICPMS data
	Date 17/09/20	Name	238U	206Pb	207Pb	238U	2σ	207Pb	2σ
	Spot Number		(cps)	(cps)	(cps)	206Pb	(%)	206Pb	(%)
	1	NIST614-01	42500	35200	30500	1.13695	2.14168	0.865901	1.26874
	2	NIST614-02	42000	34300	30400	1.14913	2.20049	0.887873	1.46232
	25	NIST614-03	41800	34600	30200	1.11728	2.09556	0.862905	1.38889
	26	NIST614-04	42400	35800	31000	1.11447	2.18487	0.864902	1.38568
	49	NIST614-05	44000	36700	31800	1.13601	2.22589	0.868897	1.37931
	50	NIST614-06	43400	37000	32200	1.11541	2.267	0.871894	1.37457
	73	NIST614-07	42300	35800	31000	1.11541	2.09908	0.8669	1.4977
	74	NIST614-08	43700	37100	32500	1.1126	1.85185	0.878885	1.25
	97	NIST614-09	43200	36500	32000	1.12852	2.57261	0.878885	1.47727
	98	NIST614-10	44200	37700	32600	1.10417	2.20526	0.864902	1.27021
	121	NIST614-11	44800	37600	32700	1.11916	2.00837	0.871894	1.37457
	122	NIST614-12	45800	38600	33500	1.12009	2.00669	0.8669	1.26728
	145	NIST614-13	44500	37800	32700	1.10979	2.44726	0.871894	1.37457
	146	NIST614-14	43400	38100	33100	1.08638	2.15517	0.873891	1.37143
	169	NIST614-15	44100	37500	32400	1.11541	2.18304	0.863904	1.27168
	170	NIST614-16	44800	37500	32800	1.10605	2.11685	0.872892	1.48741
	193	NIST614-17	42800	36800	31900	1.092	1.88679	0.873891	1.25714
	194	NIST614-18	42100	36200	31800	1.1023	2.12404	0.880882	1.47392
	216	NIST614-19	55200	46900	40600	1.1023	1.7842	0.868897	1.6092
	217	NIST614-20	51300	44400	38600	1.07233	2.09607	0.868897	1.49425
	226	NIST614-21	57200	47800	41800	1.12197	2.08681	0.873891	1.37143
	227	NIST614-22	55100	46800	40500	1.09012	1.97595	0.864902	1.27021
	3	WC-1-01	877000	35760	4206	23.1324	1.17409	0.11805	2.03046
	4	WC-1-02	555700	24520	3191	21.3623	1.18369	0.132232	2.41692
	27	WC-1-03	892800	36890	4351	22.6173	0.952381	0.11855	1.93766
	28	WC-1-04	698200	29590	3654	22.1584	1.31023	0.125041	2.23642
	51	WC-1-05	1046000	41390	4523	23.5913	1.07185	0.109161	2.1043
	52	WC-1-06	751000	30450	3790	23.0762	1.17695	0.125141	2.71349
	75	WC-1-07	1038800	43020	4703	22.6266	0.786424	0.109461	1.82482
	76	WC-1-08	653400	27100	3600	22.4674	1.45894	0.13433	2.45353
	99	WC-1-09	923400	38480	4660	22.6266	0.910596	0.121546	2.05423
	100	WC-1-10	848000	35260	4200	22.5236	1.0395	0.11815	2.11327
	123	WC-1-11	832500	35980	4834	21.7931	0.859476	0.135328	1.84502
	147	WC-1-13	826600	36290	5060	21.4279	0.961538	0.139823	1.85714
	148	WC-1-14	906500	35930	3878	23.4789	0.997208	0.108762	2.11203
	171	WC-1-15	857300	37210	4823	21.5871	1.04121	0.129635	2.00308
	172	WC-1-16	1011400	40310	3886	23.6287	1.18906	0.0969769	2.05973
	195	WC-1-17	716200	29560	3094	22.7016	0.948845	0.105366	2.46445
	196	WC-1-18	965500	39020	3414	23.1979	0.807428	0.0878885	2.15909
	218	WC-1-19	812000	32400	3428	23.4883	1.03668	0.106165	2.44591
	219	WC-1-20	839400	35260	4271	22.3925	1.00376	0.122045	2.04583
	228	WC-1-21	824200	32400	3446	23.8722	0.863084	0.106665	2.15356
	229	WC-1-22	800900	35170	4590	21.1844	1.23784	0.129935	2.07533
	5	FP19-12B-01	384500	2922	2191	125.683	2.53353	0.766028	3.91134
	6	FP19-12B-02	676100	49180	40480	12.8961	1.23457	0.823954	1.21212
	7	FP19-12B-03	773000	117980	97820	6.14366	1.52439	0.829747	1.13144
	8	FP19-12B-04	376700	82070	67500	4.30618	1.02218	0.827949	1.68878
	9	FP19-12B-05	381600	83690	69290	4.28277	1.09337	0.82735	1.06229
	10	FP19-12B-06	15440	38080	31390	0.380326	2.09308	0.824554	1.06589
	11	FP19-12B-07	7080	31660	26310	0.209971	3.07761	0.831744	1.14073
	12	FP19-12B-08	3250	40420	33730	0.0754846	3.84615	0.833642	1.16209
	13	FP19-12B-09	2278	26400	21830	0.0805418	4.18605	0.827949	1.3269
	14	FP19-12B-10	9100	25330	21090	0.337152	2.47222	0.832943	1.31894
	15	FP19-12B-11	29960	32670	27360	0.859737	2.17865	0.837937	1.43027
	16	FP19-12B-12	6000	18120	15100	0.311866	3.6036	0.835939	1.43369
	17	FP19-12B-13	247800	2642	2029	90.7501	3.71517	0.777014	3.85604
	18	FP19-12B-14	62980	1450	1157	41.3011	2.94785	0.808973	4.44444
	19	FP19-12B-15	222900	2693	2138	77.6386	2.41255	0.79599	3.01129
	20	FP19-12B-16	904000	16810	13580	50.6664	2.21811	0.807975	1.60692
	21	FP19-12B-17	393100	3112	2365	119.876	2.34375	0.768025	3.38101
	22	FP19-12B-18	455200	3799	3022	113.976	2.87592	0.80398	3.10559
	23	FP19-12B-19	1178000	43300	35410	25.558	1.17259	0.818461	1.12264
	24	FP19-12B-20	690000	85650	70400	7.55782	2.10657	0.822157	0.996113
	29	FP19-12B-21	584700	70500	58130	7.76386	1.20627	0.823455	1.03093
	30	FP19-12B-22	773000	117500	97100	6.15583	1.43009	0.826451	0.89426
	31	FP19-12B-23	1845000	55200	45170	31.4394	1.37027	0.823954	2.18182
	32	FP19-12B-24	6350	19530	16020	0.303343	2.77864	0.819959	1.33983
	33	FP19-12B-25	10160	23860	19790	0.39709	2.35849	0.829947	1.56438
	34	FP19-12B-26	1962	28440	23670	0.0645271	5.07983	0.83494	1.43541
	35	FP19-12B-27	3170	34510	28390	0.086161	3.69565	0.824554	1.19913
	36	FP19-12B-28	240400	154930	128510	1.4535	1.41753	0.828848	0.638631
	37	FP19-12B-29	1197000	84960	69780	13.2051	0.921986	0.820159	0.998539
	38	FP19-12B-30	396200	85300	70410	4.35301	1.35542	0.825952	1.81378
	39	FP19-12B-31	473700	99670	82570	4.46071	1.84758	0.829947	1.32371
	40	FP19-12B-32	805500	58900	48200	12.8773	1.23636	0.825952	2.5393
	41	FP19-12B-33	1138000	40150	33140	26.5601	1.90409	0.826951	1.57005
	42	FP19-12B-34	2699000	24130	18880	105.547	2.04082	0.779011	1.41026
	43	FP19-12B-35	2563000	57360	46780	41.938	0.915587	0.816863	0.831397
	44	FP19-12B-36	2569000	77440	63060	31.1397	1.56391	0.814167	0.944553
	45	FP19-12B-37	1048000	72890	60190	13.6921	3.28317	0.825153	1.05301
	46	FP19-12B-38	84500	11410	9420	7.00527	2.27273	0.829947	1.68472
	47	FP19-12B-39	481200	114300	94400	3.96434	2.05528	0.82725	0.917542
	48	FP19-12B-40	249200	180600	149600	1.29429	2.02605	0.831345	1.17732
	53	FP19-12B-41	562300	147000	122200	3.61689	2.09736	0.834241	0.95774
	54	FP19-12B-42	123700	7530	6150	15.4247	1.88221	0.821957	2.43013
	55	FP19-12B-43	313400	27840	23150	10.5735	1.32861	0.831944	1.44058
	56	FP19-12B-44	295500	79400	66400	3.68058	3.81679	0.830846	1.0458
	57	FP19-12B-45	581100	110500	91460	4.94583	1.07934	0.829348	0.939306
	58	FP19-12B-46	545600	95330	78910	5.35978	1.11829	0.82715	0.869355
	59	FP19-12B-47	584700	245500	203100	2.22708	1.00925	0.82745	0.7242
	60	FP19-12B-48	538400	239100	197560	2.12125	1.54525	0.825752	0.580552
	61	FP19-12B-49	699900	234400	194300	2.79555	0.770519	0.82715	0.748611
	62	FP19-12B-50	940400	255100	209500	3.45393	1.19306	0.820958	0.790754
	63	FP19-12B-51	568600	421700	348300	1.26338	0.681987	0.825153	0.508351
	64	FP19-12B-52	26080	2453	2042	10.1988	3.39761	0.845926	3.77804
	65	FP19-12B-53	7790	3020	2491	2.44716	3.52086	0.841932	3.08422
